# Supplementary material
Source: PubMed Central journal article supplement (PMC3026458)

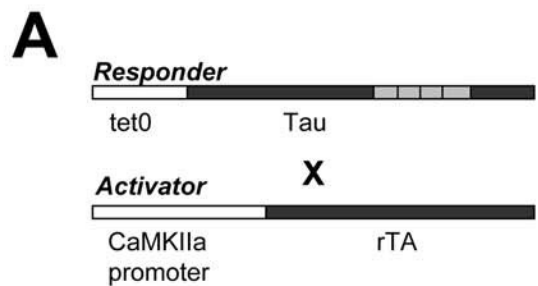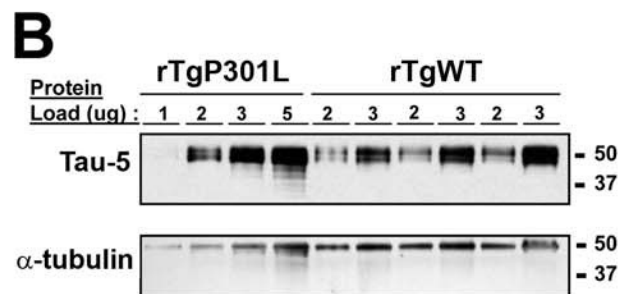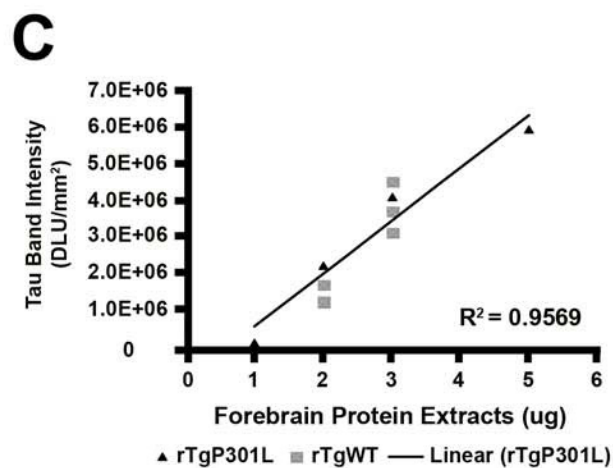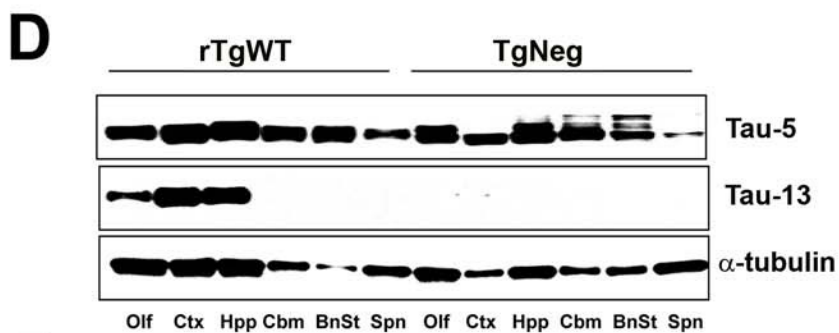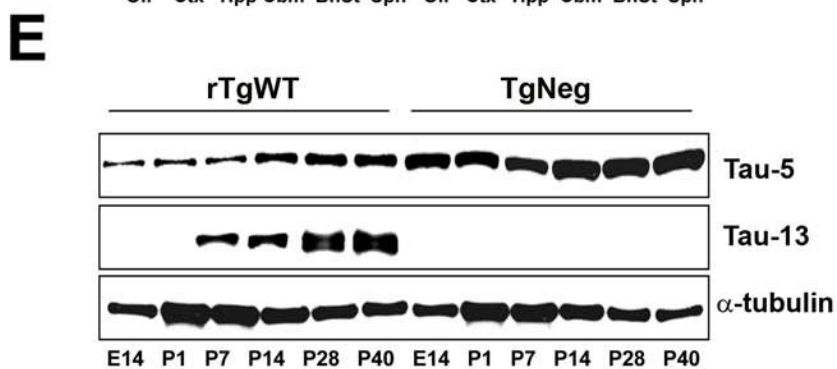

Supplement: NIHMS254011-supplement-02.pdf [file NIHMS254011-supplement-02.pdf]

**A**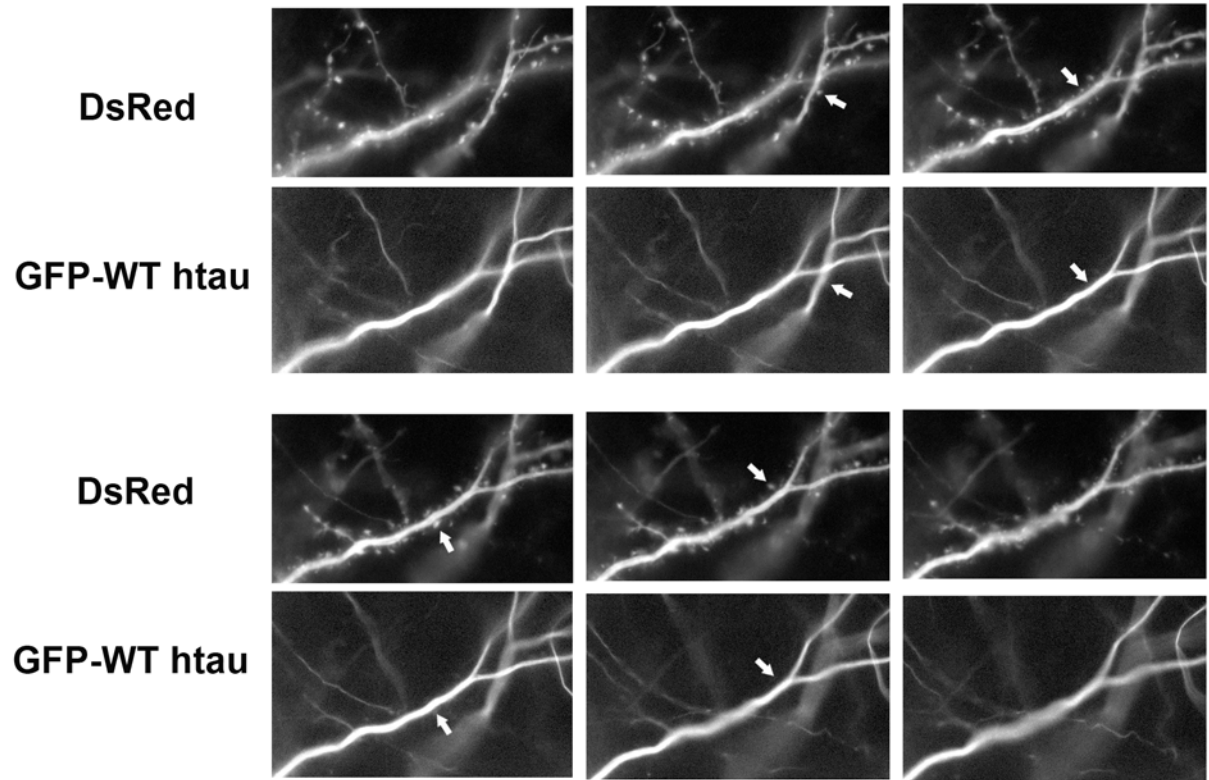**B**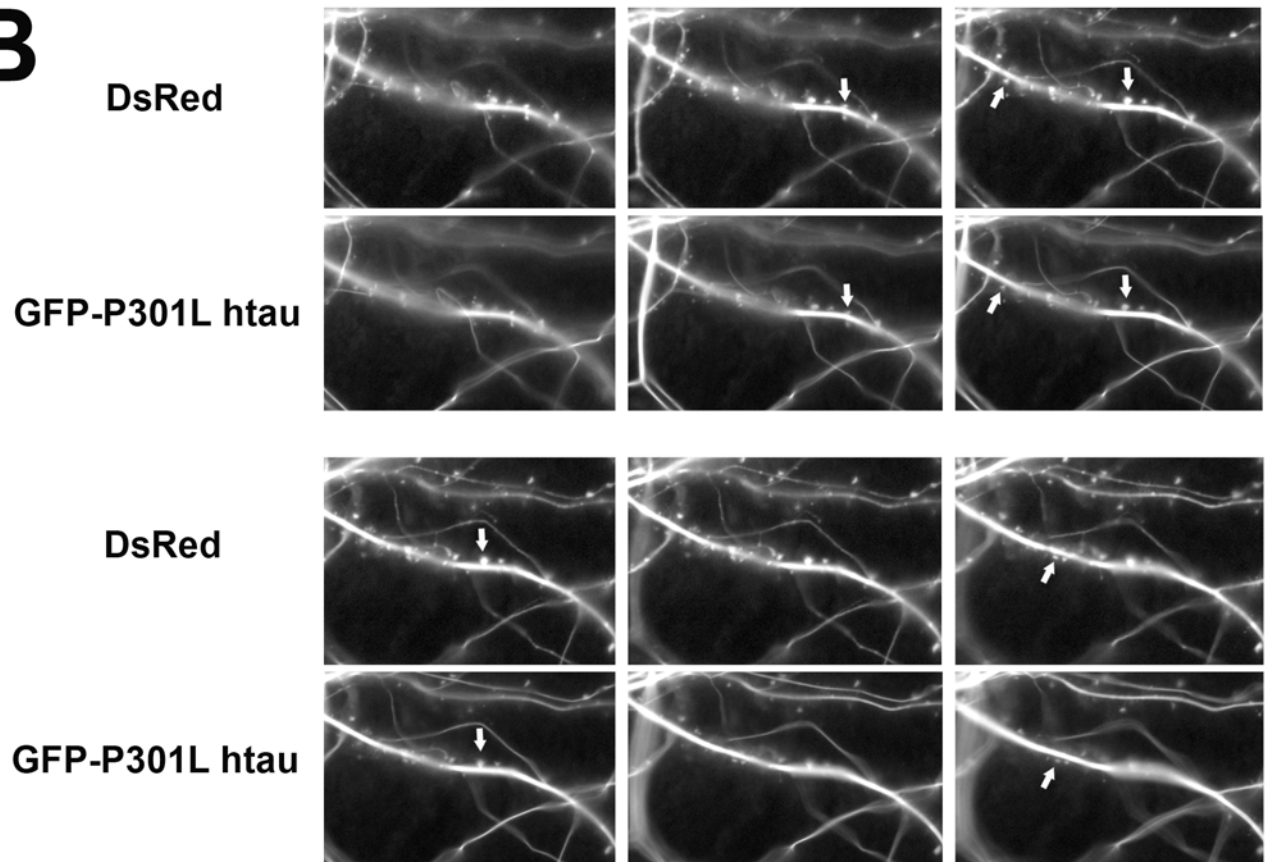

Supplement: NIHMS254011-supplement-03.pdf [file NIHMS254011-supplement-03.pdf]
